# Supplementary material for: Natural Product Skatole Ameliorates Lipotoxicity-Induced Multiple Hepatic Damage under Hyperlipidemic Conditions in Hepatocytes
Source: MDPI journal article supplement (doi:10.3390/nu15061490), 2023-03-20
Supplement: s1 [file s1]

**Table S1.** The list of antibodies for western blotting.

| <b>Antibody</b>                        | <b>Company</b>            | <b>Cat No</b> |
|----------------------------------------|---------------------------|---------------|
| $\beta$ -Actin (13E5)                  | Cell Signaling Technology | 4970          |
| Fatty Acid Synthase (C20G5)            | Cell Signaling Technology | 3180          |
| Lipin-1 (H-120)                        | Santa Cruz Biotechnology  | sc-98450      |
| Phospho-Akt (Ser473)                   | Cell Signaling Technology | 4060          |
| AKT                                    | Cell Signaling Technology | 9272          |
| G6Pase-a (H-60)                        | Santa Cruz Biotechnology  | sc-25840      |
| PCK1 (D12F5)                           | Cell Signaling Technology | 12940         |
| BiP (C50B12)                           | Cell Signaling Technology | 3177          |
| CHOP (L63F7)                           | Cell Signaling Technology | 2895          |
| ATF-6 (D4Z8V)                          | Cell Signaling Technology | 65880         |
| IRE1 $\alpha$ (14C10)                  | Cell Signaling Technology | 3294          |
| PERK (C33E10)                          | Cell Signaling Technology | 3192          |
| SAPK/JNK                               | Cell Signaling Technology | 9252          |
| Phospho-SAPK/JNK (Thr183/Tyr185)       | Cell Signaling Technology | 9251          |
| eIF2 $\alpha$ (D7D3)                   | Cell Signaling Technology | 5324          |
| Phospho-eIF2 $\alpha$ (Ser51) (119A11) | Cell Signaling Technology | 3597          |
| PARP (46D11)                           | Cell Signaling Technology | 9532          |
| Caspase-3                              | Cell Signaling Technology | 9662          |
| Cleaved caspase-3 (Asp175)             | Cell Signaling Technology | 9661          |
| Bcl-2                                  | Cell Signaling Technology | 2876          |
| Bax                                    | Cell Signaling Technology | 2772          |
| TNF- $\alpha$                          | Abcam                     | ab6671        |
| IL-6                                   | Santa Cruz Biotechnology  | sc-57315      |
| p38 MAPK (D13E1)                       | Cell Signaling Technology | 8690          |
| Phospho-p38 MAPK (Thr180/Tyr182)       | Cell Signaling Technology | 9211          |
